# Supplementary material
Source: MDPI journal article supplement (https://www.mdpi.com/2071-1050/12/3/1243)
Supplement: s1 [file s1]

# Understanding Rural Water Services as a Complex System: An assessment of key factors as potential leverage points for improved service sustainability

*Nicholas Valcourt<sup>1,3\*</sup>, Jeffrey Walters<sup>2,3</sup>, Amy Javernick-Will<sup>1,3</sup>, Karl Linden<sup>1,3</sup>, Betelhem Hailegiorgis<sup>3,4</sup>*

<sup>1</sup> Department of Civil, Environmental, and Architectural Engineering, University of Colorado Boulder, Boulder, CO 80309

<sup>2</sup> College of Engineering, George Fox University, Newberg, OR 97132

<sup>3</sup> Sustainable WASH Systems Learning Partnership

<sup>4</sup> IRC-WASH, Ethiopia

\* Correspondence: Nicholas.Valcourt@Colorado.edu

## Supplementary Materials

### Contents

**Table S1:** Demographic context information

**Table S2:** Matrix of indirect influences (Kamuli example)

**Table S3:** Factor names and definitions for all contexts

**Figure S1:** Factor influence and dependence rankings (Kamuli example)

**Figure S2:** Cross-impact matrices by context

**Table S4:** Common feedback loops

**Table S5:** Influence, dependence and feedback rankings for common factor by leverage point criteria

**Table S6:** Influence, dependence and feedback rankings for common factor by context

**Table S1.** Demographic context information; Descriptive characteristics of rural water service delivery coverage, functionality, schemes and management for each context where the factor mapping workshops were conducted

|                           | South Ari Woreda,<br>Ethiopia                         | Mille Woreda,<br>Ethiopia                                           | Kabarole District,<br>Uganda                                               | Kamuli District,<br>Uganda                          |
|---------------------------|-------------------------------------------------------|---------------------------------------------------------------------|----------------------------------------------------------------------------|-----------------------------------------------------|
| <b>Population</b>         | 279,574                                               | 117,960                                                             | 486,319                                                                    | 469,236                                             |
| <b>Water access</b>       | 26%                                                   | 23%                                                                 | 73 %                                                                       | 75%                                                 |
| <b>Functionality</b>      | 69%                                                   | 87%                                                                 | 84%                                                                        | 88%                                                 |
|                           | n=348                                                 | n=31                                                                | n=1,577                                                                    | n= 1,300                                            |
| <b>Water schemes</b>      | Hand pumps (34%), motorized wells (11%), Spring (55%) | Hand pump (48%), motorized wells (45%), Shallow Hand-dug wells (6%) | Springs (495), Shallow wells (631), Deep Boreholes (64), Pipe stands (386) | Springs (21), Shallow Wells (487), Deep Wells (792) |
| <b>Management Schemes</b> | Community Mgmt, Local Utilities                       | Community Mgmt, Local Utilities                                     | Community Mgmt, Local Utilities, Private Sector                            | Community Mgmt, Local Utilities, Private Sector     |
| <b>Source</b>             | IRC SWS Baseline Report (2018)                        |                                                                     | Uganda National Water Sector Report (2016), Uganda National Census (2014)  |                                                     |

**Table S2.** Matrix of indirect influences (Kamuli Example); calculated from three iterations of matrix multiplication of Kamuli cross-impact matrix. Each cell contains the potential indirect strength of influence from the factor in the row onto the factor in the respective column.

|                               | <b>Water User Committee</b> | <b>Mechanics</b> | <b>User Fees</b> | <b>Political Support</b> | <b>Water Source By-laws</b> | <b>Monitoring</b> | <b>Spare Parts</b> | <b>Water Users</b> | <b>Service Sustainability</b> |
|-------------------------------|-----------------------------|------------------|------------------|--------------------------|-----------------------------|-------------------|--------------------|--------------------|-------------------------------|
| <b>Water User Committee</b>   |                             | 9780             | 10702            | 4247                     | 8820                        | 8056              | 11151              | 9710               | 11740                         |
| <b>Mechanics</b>              | 5899                        |                  | 6807             | 2706                     | 5607                        | 5028              | 7025               | 6121               | 7305                          |
| <b>Water User Fees</b>        | 8087                        | 8493             |                  | 3674                     | 7740                        | 7022              | 9739               | 8372               | 10132                         |
| <b>Political Support</b>      | 6628                        | 7019             | 7648             |                          | 6302                        | 5701              | 7952               | 6924               | 8332                          |
| <b>Water Source By-laws</b>   | 8251                        | 8827             | 9478             | 3797                     |                             | 7114              | 10049              | 8726               | 10336                         |
| <b>Monitoring</b>             | 5583                        | 5900             | 6455             | 2561                     | 5385                        |                   | 6829               | 5904               | 7175                          |
| <b>Spare Parts</b>            | 6739                        | 7210             | 7690             | 3100                     | 6414                        | 5756              |                    | 7156               | 8394                          |
| <b>Water Users</b>            | 9851                        | 10500            | 11370            | 4545                     | 9364                        | 8452              | 11851              |                    | 12404                         |
| <b>Service Sustainability</b> | 9501                        | 10029            | 11020            | 4369                     | 9106                        | 8348              | 11555              | 10030              |                               |

**Table S3.** Names and definitions of factors for each context as proposed by workshop participants with common factor category name for affinity grouping

| Context  | Original Name                                                                                                                                                                                                                                                                          | Definition                                                                                                                                                                                                                                                                                                                       | Common Factor Category    |
|----------|----------------------------------------------------------------------------------------------------------------------------------------------------------------------------------------------------------------------------------------------------------------------------------------|----------------------------------------------------------------------------------------------------------------------------------------------------------------------------------------------------------------------------------------------------------------------------------------------------------------------------------|---------------------------|
| Kabarole | Community Ownership                                                                                                                                                                                                                                                                    | Sense of responsibility, participation and involvement with community water point                                                                                                                                                                                                                                                | Community                 |
|          | Coordination                                                                                                                                                                                                                                                                           | Mechanisms and platforms bring stakeholders together, to share information, working collaboratively with particular attention to local government & CSOs                                                                                                                                                                         | Coordination              |
|          | Financing                                                                                                                                                                                                                                                                              | Funds available through government transfers & grants (district level), tariffs & taxes AND Community Capital Contributions (CCC) for water services                                                                                                                                                                             | Financing                 |
|          | Technology                                                                                                                                                                                                                                                                             | Physical, functional infrastructure system(s) that are in place to reliably deliver clean water                                                                                                                                                                                                                                  | Hardware                  |
|          | Local Government Capacity                                                                                                                                                                                                                                                              | Skills and knowledge needed to execute duties of position; human resource capacity                                                                                                                                                                                                                                               | Local Capacity            |
|          | O&M                                                                                                                                                                                                                                                                                    | Repairs, servicing, rehabilitation, correct use and operation                                                                                                                                                                                                                                                                    | O&M                       |
|          | Political                                                                                                                                                                                                                                                                              | The influence, planning, decisions making and actions of local lawmakers; district and local councilors                                                                                                                                                                                                                          | Politics                  |
|          | Private Sector Involvement                                                                                                                                                                                                                                                             | Organizations that supply materials and financing for water point construction, maintenance and rehabilitation. Includes HPMA's, contractors, NGOs, financial institutions & hardware dealers                                                                                                                                    | Private Sector            |
|          | Water Resource Management                                                                                                                                                                                                                                                              | Planning, use allocation, information sharing around policies for protection of local watershed and environmental resources                                                                                                                                                                                                      | Water Resource Management |
| Kamuli   | Spare parts                                                                                                                                                                                                                                                                            | Durable, availability, quality and affordable                                                                                                                                                                                                                                                                                    | Hardware                  |
|          | Mechanics                                                                                                                                                                                                                                                                              | Mechanics are reliable, trained, equipped, accessible and trustworthy                                                                                                                                                                                                                                                            | Mechanics                 |
|          | Supervision + Monitoring                                                                                                                                                                                                                                                               | Checklist followed by technical group                                                                                                                                                                                                                                                                                            | Monitoring                |
|          | Political Presence + Support                                                                                                                                                                                                                                                           | Politicians putting in place enabling policies                                                                                                                                                                                                                                                                                   | Politics                  |
|          | Water Source By-laws                                                                                                                                                                                                                                                                   | Approved by subcounty authorities, enacted by the community                                                                                                                                                                                                                                                                      | Regulations               |
|          | Water user committee                                                                                                                                                                                                                                                                   | A fully constituted, trained and functional committee                                                                                                                                                                                                                                                                            | User Committees           |
|          | Water user fees                                                                                                                                                                                                                                                                        | An agreed upon amount which is collected periodically (incl safe custody)                                                                                                                                                                                                                                                        | User Fees                 |
|          | Water Users Know Roles                                                                                                                                                                                                                                                                 | Each water user is being accountable                                                                                                                                                                                                                                                                                             | Users                     |
|          | <u>Identified, but not included in matrix:</u> A strong PPP Approach, Community Attitude, Hygiene and Sanitation, Land Tenure System, Location of Water Services, Presence of Political Parties, Safe Custody of Water Fees, Transparency and accountability, Tree planning, Vandalism |                                                                                                                                                                                                                                                                                                                                  |                           |
|          | Environmental & Water Resources                                                                                                                                                                                                                                                        | Quantity of water available, including availability of water (groundwater, reservoirs, rivers, and rainwater). Includes conducting hydrogeological assessments for groundwater. Seasonal variation (wet season and dry season fluctuations), but also larger climatic changes such as drought and desertification, and geography | Water Resource Management |
|          | <u>Identified, but not included in matrix:</u> Absence of Data, Culture                                                                                                                                                                                                                |                                                                                                                                                                                                                                                                                                                                  |                           |

| Context   | Original Name                                                    | Definition                                                                                                                                                                                                                                                                                                                                                                                                                                                                 | Common Factor Category    |
|-----------|------------------------------------------------------------------|----------------------------------------------------------------------------------------------------------------------------------------------------------------------------------------------------------------------------------------------------------------------------------------------------------------------------------------------------------------------------------------------------------------------------------------------------------------------------|---------------------------|
| Mille     | Coordination                                                     | Communication and collaboration between Woreda sector offices, with Woreda office and the community, Woreda office and NGOs.                                                                                                                                                                                                                                                                                                                                               | Coordination              |
|           | Finance                                                          | Budget available for use which is allocated from all sources including the government, NGOs and tariffs.                                                                                                                                                                                                                                                                                                                                                                   | Financing                 |
|           | Spare Part Supply                                                | Availability of spare parts, equipment, and machinery.                                                                                                                                                                                                                                                                                                                                                                                                                     | Hardware                  |
|           | Woreda Capacity                                                  | Capacity and awareness of Woreda administration offices                                                                                                                                                                                                                                                                                                                                                                                                                    | Local Capacity            |
|           | Skilled Water Technicians                                        | The ability of technicians to repair and maintain minor and major problems.                                                                                                                                                                                                                                                                                                                                                                                                | Mechanics                 |
|           | Water Demand                                                     | Increase in population increases water demand. In addition, the amount of water resource and infrastructure affects the number of people that can be served by the water schemes                                                                                                                                                                                                                                                                                           | Planning                  |
|           | Proper Use                                                       | Community's sense of ownership, proper use and management of schemes. Awareness and participation of the community and responsibility and capacity of the community.                                                                                                                                                                                                                                                                                                       | Users                     |
|           | Water Quality                                                    | The quality of water during extraction and during distribution and use. This includes proper hygiene.                                                                                                                                                                                                                                                                                                                                                                      | Water Quality             |
|           | Water Resources & Infrastructure                                 | Available water resources, planning and construction of schemes, management of existing schemes and study of potential of water sources.                                                                                                                                                                                                                                                                                                                                   | Water Resource Management |
| South Ari | Community                                                        | Participation by the community in aspects of service construction and provision.                                                                                                                                                                                                                                                                                                                                                                                           | Community                 |
|           | Coordination                                                     | Coordination of woreda offices, zone offices, kebele administrators, and the community, with a common plan. Coordination on planning activities, monitoring water schemes, training, sharing resources (technical, material, and financial resources), and sharing information.                                                                                                                                                                                            | Coordination              |
|           | Finance                                                          | Finances available through budget allocated by the government, contributed by the community, or funded through external sources                                                                                                                                                                                                                                                                                                                                            | Financing                 |
|           | Capacity Building                                                | Skills and training for existing human resources or the community, trainings and capacity building can be related to technical skills such as for O&M of the schemes (when "experts" do not have enough skills), but also can relate to hygiene, sanitation, or management in general. Experts, professionals, "skilled manpower". These experts are needed in both long-term presence but also short term "technical support" required for site selection or construction | Local Capacity            |
|           | Monitoring & Information                                         | Monitoring and evaluation of scheme functionality and use, employing monitoring technologies. Also includes gathering asset inventory information about location of schemes and monitoring of the WASHCos themselves. Information related to scheme placement and functionality but also sharing ideas, results, and lessons. Knowledge about ongoing activities.                                                                                                          | Monitoring                |
|           | O&M                                                              | Operations required for upkeep and continual functioning of the infrastructure, including technical O&M (including breakdown of infrastructure) but also including management.                                                                                                                                                                                                                                                                                             | O&M                       |
|           | Planning & Construction                                          | Planning and constructing/development/implementation of infrastructure to increase coverage (reach places that have not been reached) or to replace broken down infrastructure.                                                                                                                                                                                                                                                                                            | Planning                  |
|           | Policy                                                           | Existing governmental regulation or policy, including currently practiced governmental procedures such as mandates, responsibilities and commitments, and reporting.                                                                                                                                                                                                                                                                                                       | Regulations               |
|           | Proper Use of Water Schemes                                      | Scheme misuse and lack of protection by community as a challenge.                                                                                                                                                                                                                                                                                                                                                                                                          | Users                     |
|           | Environmental & Water Resources                                  | Quantity of water available, including availability of water (groundwater, reservoirs, rivers, and rainwater). Includes conducting hydrogeological assessments for groundwater. Seasonal variation (wet season and dry season fluctuations), but also larger climatic changes such as drought and desertification, and geography                                                                                                                                           | Water Resource Management |
|           | Identified, but not included in matrix: Absence of Data, Culture |                                                                                                                                                                                                                                                                                                                                                                                                                                                                            |                           |

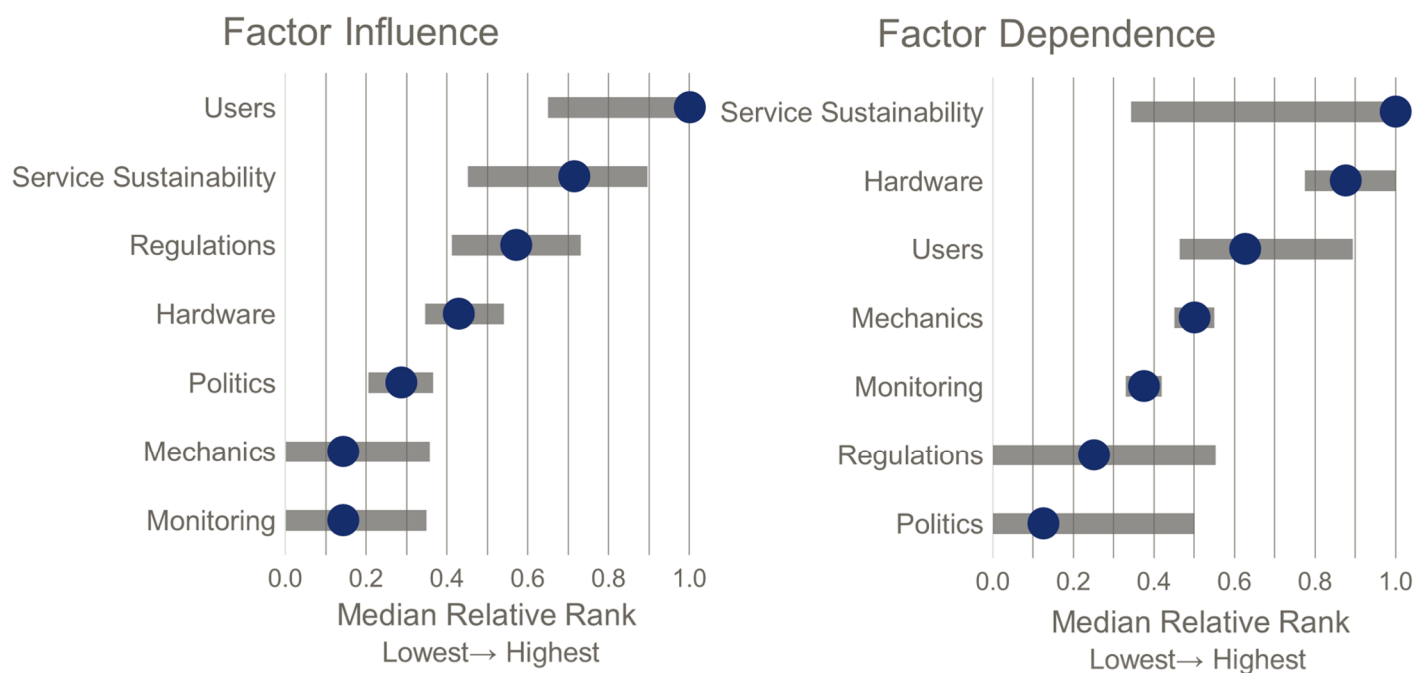

**Figure S1.** Normalized rank scores for Influence and Dependence from Kamuli overlaid onto full ranges of rank scores for all contexts where the factor was present. These factors represent 8 of the 14 total common factors identified across all contexts.

| <b>Kabarole</b>            | Operation and Maintenance | Local government capacity | Community Ownership | Technology | Private Sector Involvement | Political involvement | Coordination | Water Resource Management | Financing | Sustainable Water Services |
|----------------------------|---------------------------|---------------------------|---------------------|------------|----------------------------|-----------------------|--------------|---------------------------|-----------|----------------------------|
| Operation and Maintenance  |                           | 1                         | 3                   | 0          | 3                          | 0                     | 1            | 2                         | -3        | 3                          |
| Local government capacity  | 3                         |                           | 2                   | 3          | 3                          | 3                     | 3            | 3                         | 3         | 3                          |
| Community Ownership        | 3                         | 0                         |                     | 0          | 2                          | 1                     | 0            | 3                         | 2         | 2                          |
| Technology                 | 3                         | 1                         | 2                   |            | 2                          | 0                     | 0            | 1                         | 3         | 3                          |
| Private Sector Involvement | 3                         | 0                         | -2                  | 3          |                            | 0                     | 1            | -2                        | 1         | 2                          |
| Political involvement      | 3                         | 3                         | 3                   | 0          | 2                          |                       | 3            | 3                         | 3         | 3                          |
| Coordination               | 3                         | 3                         | 2                   | 2          | 3                          | 3                     |              | 2                         | 2         | 3                          |
| Water Resource Management  | 0                         | 0                         | 0                   | 3          | 0                          | 0                     | 2            |                           | 2         | 3                          |
| Financing                  | 3                         | 3                         | 2                   | 3          | 3                          | 3                     | 3            | 3                         |           | 3                          |
| Sustainable Water Services | 0                         | 0                         | 3                   | 0          | 1                          | 0                     | 2            | 2                         | -1        |                            |

  

| <b>Mille</b>                       | Finance | Coordination | Water Resources and Infrastructure | Proper Use | Water Techs | Spare Parts | Water Quality | Demand | Woreda Capacity | Sustainable Water Services |
|------------------------------------|---------|--------------|------------------------------------|------------|-------------|-------------|---------------|--------|-----------------|----------------------------|
| Finance                            |         | 3            | 3                                  | 2          | 3           | 3           | 1             | 3      | 3               | 3                          |
| Coordination                       | 2       |              | 3                                  | 3          | 2           | 2           | 2             | 3      | 1               | 3                          |
| Water Resources and Infrastructure | 0       | 3            |                                    | 3          | 3           | 3           | 3             | -2     | 0               | 3                          |
| Proper Use                         | 3       | 1            | 2                                  |            | 0           | 3           | 3             | 2      | 2               | 3                          |
| Water Techs                        | 3       | 3            | 3                                  | 3          |             | 2           | 3             | 1      | 1               | 3                          |
| Spare Parts                        | 2       | 3            | 3                                  | 3          | 2           |             | 3             | 1      | 2               | 3                          |
| Water Quality                      | 2       | 3            | 3                                  | 3          | 2           | 0           |               | 3      | 3               | 3                          |
| Demand                             | 3       | 3            | 3                                  | 3          | 3           | 3           | 1             |        | -3              | -1                         |
| Woreda Capacity                    | 3       | 3            | 2                                  | 2          | 3           | 3           | 3             | 1      |                 | 3                          |
| Sustainable Water Services         | 3       | 3            | 3                                  | 3          | 3           | 2           | 3             | -3     | -3              |                            |

  

| <b>South Ari</b>               | Coordination | Finance | Community | Proper Use | O&M | Planning & Construction | Monitoring & Information | Capacity Building | Environmental & WaterResources | Policy | Sustainable Water Services |
|--------------------------------|--------------|---------|-----------|------------|-----|-------------------------|--------------------------|-------------------|--------------------------------|--------|----------------------------|
| Coordination                   |              | 3       | 2         | 3          | 3   | 3                       | 3                        | 1                 | 3                              | 3      | 3                          |
| Finance                        | 2            |         | -1        | 0          | 3   | 3                       | 2                        | 3                 | 1                              | 3      | 3                          |
| Community                      | 3            | 3       |           | 3          | 3   | 3                       | 3                        | 3                 | 3                              | 3      | 3                          |
| Proper Use                     | 1            | 3       | 3         |            | 3   | 2                       | 1                        | 1                 | 3                              | 3      | 3                          |
| O&M                            | 3            | 3       | 1         | 3          |     | 3                       | 1                        | 3                 | 2                              | 2      | 3                          |
| Planning & Construction        | 3            | 2       | 3         | 3          | 3   |                         | 2                        | 2                 | 3                              | 2      | 3                          |
| Monitoring & Information       | 2            | 2       | 2         | 3          | 3   | 1                       |                          | 3                 | 3                              | 3      | 3                          |
| Capacity Building              | 3            | 3       | 3         | 3          | 3   | 3                       | 3                        |                   | 3                              | 3      | 3                          |
| Environmental & WaterResources | 2            | 3       | -1        | -1         | 1   | 3                       | 1                        | 1                 |                                | 3      | 3                          |
| Policy                         | 3            | 3       | 2         | 3          | 3   | 3                       | 3                        | 3                 | 3                              |        | 3                          |
| Sustainable Water Services     | 3            | 1       | 3         | 3          | 3   | 0                       | 3                        | 1                 | 2                              | 3      |                            |

  

| <b>Kamuli</b>                | Water User Committees | Mechanics | Water User Fees | Political Presence + Support | Water Source By-laws | Supervision + Monitoring | Spare Parts | Water Users Know Roles | Sustainable Water Services |
|------------------------------|-----------------------|-----------|-----------------|------------------------------|----------------------|--------------------------|-------------|------------------------|----------------------------|
| Water User Committees        |                       | 2         | 3               | 1                            | 3                    | 1                        | 3           | 3                      | 3                          |
| Mechanics                    | 1                     |           | 1               | 0                            | 1                    | 2                        | 3           | 1                      | 3                          |
| Water User Fees              | 1                     | 3         |                 | 1                            | 1                    | 2                        | 3           | 3                      | 3                          |
| Political Presence + Support | 3                     | 0         | 1               |                              | 3                    | 2                        | 1           | 2                      | 1                          |
| Water Source By-laws         | 3                     | 1         | 3               | 1                            |                      | 1                        | 1           | 3                      | 3                          |
| Supervision + Monitoring     | 2                     | 3         | 1               | 1                            | 1                    |                          | 2           | 1                      | 1                          |
| Spare Parts                  | 1                     | 2         | 3               | 1                            | 1                    | 2                        |             | 1                      | 3                          |
| Water Users Know Roles       | 3                     | 2         | 3               | 1                            | 3                    | 3                        | 3           |                        | 3                          |
| Sustainable Water Services   | 3                     | 3         | 3               | 1                            | 3                    | -1                       | -3          | 3                      |                            |

**Figure S2.** Cross Impact Matrices by context representing the interaction of factors where each cell contains the strength and polarity of influence from the factor in the row onto the factor in the respective column. Strength is represented as 0 – no connection, 1 – weak influence, 2 – moderate influence, 3-strong influence and polarity is represented as positive (+/no sign) or inverse (-).

**Table S4.** Feedback loops common to two or more contexts with low, average and high rank where present. (X) indicates feedback loop was present in that context, ( \*) indicates one or more factors in the loop was not present in that context's cross-impact matrix

| Rank                                 |      |     | Feedback Loop                                                    | Length | Contexts | South Ari     | Kamuli        | Kabarole       | Mille          |
|--------------------------------------|------|-----|------------------------------------------------------------------|--------|----------|---------------|---------------|----------------|----------------|
| Avg                                  | High | Low |                                                                  |        |          |               |               |                |                |
| 2                                    | 1    | 2   | Users → Sustainability                                           | 1      | 2 / 3    |               | X             | *              | X              |
| 12                                   | 7    | 16  | Financing → WRM → Coordination → Sustainability                  | 3      | 2 / 3    |               | *             | X              | X              |
| 14                                   | 8    | 19  | Financing → WRM → Sustainability                                 | 2      | 2 / 3    |               | *             | X              | X              |
| 55                                   | 35   | 74  | Users → Regulations → Sustainability                             | 2      | 2 / 2    | X             | X             | *              | *              |
| 100                                  | 57   | 142 | Coordination → Local Capacity → Financing → Sustainability       | 3      | 2 / 3    |               | *             | X              | X              |
| 158                                  | 127  | 188 | Local Capacity → Sustainability                                  | 1      | 2 / 3    | X             | *             |                | X              |
| 204                                  | 109  | 299 | Financing → WRM → Hardware → Sustainability                      | 3      | 2 / 3    |               | *             | X              | X              |
| 230                                  | 194  | 265 | Coordination → Sustainability                                    | 1      | 2 / 3    | X             | *             | X              |                |
| 233                                  | 139  | 327 | Financing → WRM → Coordination → Hardware → Sustainability       | 4      | 2 / 2    | *             | *             | X              | X              |
| 311                                  | 23   | 599 | Financing → WRM → Coordination → Local Capacity → Sustainability | 4      | 2 / 3    |               | *             | X              | X              |
| 333                                  | 3    | 662 | Financing → Local Capacity → Sustainability                      | 2      | 2 / 3    |               | *             | X              | X              |
| 337                                  | 38   | 635 | Coordination → Local Capacity → Sustainability                   | 2      | 2 / 3    |               | *             | X              | X              |
| 337                                  | 99   | 574 | Coordination → WRM → Hardware → Financing → Sustainability       | 4      | 2 / 2    | *             | *             | X              | X              |
| 355                                  | 12   | 698 | Financing → Local Capacity → Coordination → Sustainability       | 3      | 2 / 3    |               | *             | X              | X              |
| 372                                  | 355  | 389 | Coordination → O&M → Local Capacity → Sustainability             | 3      | 2 / 2    | X             | *             | X              | *              |
| 584                                  | 450  | 717 | Coordination → Local Capacity → Financing → WRM → Sustainability | 4      | 2 / 3    |               | *             | X              | X              |
| 701                                  | 572  | 829 | Users → Hardware → Mechanics → Sustainability                    | 3      | 2 / 3    | *             | X             |                | X              |
| Loop frequency where factors present |      |     |                                                                  |        |          | 4/14<br>(26%) | 3/3<br>(100%) | 13/15<br>(86%) | 14/15<br>(93%) |



**Table S5.** Influence, dependence and feedback rankings for common factors, by leverage point criteria

| Factor         | Influence Rank |        |       |           | Dependence Rank |        |       |           | Feedback Rank |        |       |           |
|----------------|----------------|--------|-------|-----------|-----------------|--------|-------|-----------|---------------|--------|-------|-----------|
|                | Kabarole       | Kamuli | Mille | South Ari | Kabarole        | Kamuli | Mille | South Ari | Kabarole      | Kamuli | Mille | South Ari |
| Community      | 4              |        |       | 1         | 6               |        |       | 7         | 5             |        |       | 5         |
| Coordination   | 5              |        | 5     | 3         | 2               |        | 1     | 4         | 2             |        | 2     | 3         |
| Financing      | 3              |        | 2     | 8         | 1               |        | 3     | 2         | 1             |        | 4     | 8         |
| Functionality  | 1              | 3      | 1     | 5         | 8               | 1      | 1     | 1         |               |        |       |           |
| Hardware       | 6              | 5      | 4     |           | 4               | 2      | 3     |           | 8             | 2      | 6     |           |
| Local Capacity | 7              |        | 3     | 1         | 1               |        | 5     | 5         | 4             |        | 8     | 4         |
| Mechanics      |                | 7      | 4     |           |                 | 5      | 3     |           |               | 3      | 5     |           |
| Monitoring     |                | 7      |       | 5         | 6               |        |       | 6         |               | 5      |       | 9         |
| O&M            |                |        |       | 6         | 3               |        |       | 2         | 3             |        |       | 2         |
| Planning       |                |        | 3     | 4         |                 |        | 4     | 3         |               |        | 7     | 6         |
| Politics       | 8              | 6      |       |           | 2               | 8      |       |           | 7             |        |       |           |
| Regulations    |                | 4      |       | 2         |                 | 7      |       | 2         |               | 4      |       | 1         |
| Users          |                | 1      | 7     | 7         |                 | 4      | 1     | 4         |               | 1      | 3     | 7         |
| WRM            | 2              |        | 6     | 9         | 7               |        | 1     | 3         | 6             |        | 1     | 10        |

**Table S6.** Influence, dependence and feedback rankings for common factors by context

| Factor         | Kabarole  |            |          | Kamuli    |            |          | Mille     |            |          | South Ari |            |          |
|----------------|-----------|------------|----------|-----------|------------|----------|-----------|------------|----------|-----------|------------|----------|
|                | Influence | Dependence | Feedback |
| Community      | 4         | 6          | 5        |           |            |          |           |            |          | 1         | 7          | 5        |
| Coordination   | 5         | 2          | 2        |           |            |          | 5         | 1          | 2        | 3         | 4          | 3        |
| Financing      | 3         | 1          | 1        |           |            |          | 2         | 3          | 4        | 8         | 2          | 8        |
| Functionality  | 1         | 8          |          | 3         | 1          |          | 1         | 1          |          | 5         | 1          |          |
| Hardware       | 6         | 4          | 8        | 5         | 2          | 2        | 4         | 3          | 6        |           |            |          |
| Local Capacity | 7         | 1          | 4        |           |            |          | 3         | 5          | 8        | 1         | 5          | 4        |
| Mechanics      |           |            |          | 7         | 5          | 3        | 4         | 3          | 5        |           |            |          |
| Monitoring     |           |            |          | 7         | 6          | 5        |           |            |          | 5         | 6          | 9        |
| O&M            |           | 3          | 3        |           |            |          |           |            |          | 6         | 2          | 2        |
| Planning       |           |            |          |           |            |          | 3         | 4          | 7        | 4         | 3          | 6        |
| Politics       | 8         | 2          | 7        | 6         | 8          |          |           |            |          |           |            |          |
| Regulations    |           |            |          | 4         | 7          | 4        |           |            |          | 2         | 2          | 1        |
| Users          |           |            |          | 1         | 4          | 1        | 7         | 1          | 3        | 7         | 4          | 7        |
| WRM            | 2         | 7          | 6        |           |            |          | 6         | 1          | 1        | 9         | 3          | 10       |

Formatting reversed for dependence, a high score is more desirable than a low score (more versus less independent). Note that multiple factors can have the same rating within a context based on values in rows and columns of cross-impact matrix.
